# Supplementary material for: Quantifying global costs of reliable green hydrogen
Source: Royal Society of Chemistry journal article supplement (doi:10.1039/d3ya00318c), 2023-01-01
Supplement: d3ya00318c1.pdf [file d3ya00318c1.pdf]

## Supplementary material to “Quantifying global costs of reliable green hydrogen.”

Freire Ordóñez, D.,<sup>a, b</sup> Ganzer, C.,<sup>a, d</sup> Halfdanarson, T.,<sup>d</sup> González Garay, A.,<sup>a</sup> Patrizio, P.,<sup>d</sup> Bardow, A.,<sup>c</sup> Guillén-Gosálbez, G.,<sup>e</sup> Shah, N.,<sup>a</sup> Mac Dowell, N.<sup>a, d, \*</sup>

---

<sup>a</sup> The Sargent Centre for Process Systems Engineering, Imperial College London, UK.

<sup>b</sup> Institute for Applied Sustainability Research, Quito, Ecuador

<sup>c</sup> Energy and Process Systems Engineering, Department of Mechanical and Process Engineering, ETH Zürich, Switzerland

<sup>d</sup> Centre for Environmental Policy, Imperial College London, UK.

<sup>e</sup> Institute for Chemical and Bioengineering, Department of Chemistry and Applied Biosciences, ETH Zürich, Switzerland.

\* E-mail: [niall@imperial.ac.uk](mailto:niall@imperial.ac.uk)

---

### Contents

|            |                                                                          |    |
|------------|--------------------------------------------------------------------------|----|
| Appendix A | Methods .....                                                            | 2  |
| Appendix B | Input data for $\gamma$ -AW:E model .....                                | 8  |
| Appendix C | Green H <sub>2</sub> best production locations and cost breakdowns ..... | 10 |
| References | .....                                                                    | 13 |

---

## Appendix A Methods

### A.1. PEMEL investment costs

This economic analysis is based on the production of *PEMELs* having a capacity of 1 MW (400 kg H<sub>2</sub>/d), according to the inventories reported by Bareiß *et al.* [1] and the National Renewable Energy Laboratory (*NREL*) [2]. According to this, the demand for H<sub>2</sub> will be satisfied by increasing the number of electrolyzers up to the desired production rate. The stack is manufactured in-house, while the elements of the *BOP* are outsourced. The system specifications considered for the stack are presented in Table A-1.

**Table A-1. System specifications for the PEM electrolysis system analysed.**

| Specification                              | Quantity |
|--------------------------------------------|----------|
| Stack power (kW)                           | 1,000    |
| Cell voltage (V)                           | 1.7      |
| Current density (A/cm <sup>2</sup> )       | 1.7      |
| Power density (W/cm <sup>2</sup> )         | 2.9      |
| Cell efficiency (%)                        | 86       |
| Anode loading (mg/cm <sup>2</sup> )        | Ir: 2    |
| Cathode loading (mg/cm <sup>2</sup> )      | Pt: 0.75 |
| Membrane thickness (μm)                    | 200      |
| Single-cell format area (cm <sup>2</sup> ) | 957      |
| Active cell format area (cm <sup>2</sup> ) | 748      |
| Total active area (m <sup>2</sup> )        | 34.7     |
| Number of cells per system                 | 510      |
| Stacks per system                          | 2        |
| Cells per stack                            | 255      |
| H <sub>2</sub> production (kg/d)           | 400      |

The cost per electrolyser of 1 MW capacity was calculated using the material costs reported in Table A-2. Economies of scale are applied, including learning curve rates from 0 to a maximum of 18% for the stack, 8% for anode and cathode catalysts, 12% for the power supplies, 7% for the gas conditioning, and 10% for the remaining elements of the *BOP* [3,4]. The manufacturing costs of the stack were calculated following the procedure reported by the *NREL*, which serves as a proxy to estimate the manufacturing costs [2]. Regarding markup and installation, we applied the factors for stationary *PEM* fuel cell systems proposed by James and DeSantis [5]. Their report concludes that a markup rate of 50% is a representative value with no account for recurring engineering or equipment warranty. This value also correlates to a 33% gross margin and represents a mature, established business. To include variations of this element in the cost of the electrolyser, we consider a range between 20 and 70% of the *CAPEX* of the electrolyser. Similarly, the installation factor is considered from 1.33 to 1.83 [5].

The cost of the electrolyser is finally determined by sampling the learning curves of the corresponding elements according to the ranges described assuming a normal distribution with a standard deviation (*SD*) being one-sixth of the corresponding ranges. A total of 3,000 independent samples were considered for each component of the electrolyser.

**Table A-2. Reference cost for raw materials and outsourced equipment**

| Element                                                        | Cost (USD/unit) | Reference |
|----------------------------------------------------------------|-----------------|-----------|
| Platinum (g)                                                   | 24.9            | [6]       |
| Iridium (g)                                                    | 34.2            | [6]       |
| Gold (g)                                                       | 41              | [6]       |
| Titanium (kg)                                                  | 35              | [6]       |
| Steel (978 cm <sup>2</sup> pc)                                 | 5               | [2]       |
| Aluminium (kg)                                                 | 15.4            | [6]       |
| Nafion® membrane (30x30cm pc)                                  | 200             | [7]       |
| Power Supplies (per electrolyser 1 MW)                         | 198,565         | [2]       |
| Deionised H <sub>2</sub> O Circulation (per electrolyser 1 MW) | 87,082          | [2]       |
| H <sub>2</sub> Processing (per electrolyser 1 MW)              | 83,880          | [2]       |
| Cooling (per electrolyser 1 MW)                                | 28,678          | [2]       |
| Miscellaneous (per electrolyser 1 MW)                          | 6,000           | [2]       |

From this analysis, current costs of  $1,750 \pm 350$  USD/kW (for 100 electrolyser units per year) and future costs of  $1,000 \pm 350$  USD/kW (assuming 50,000 electrolyser units per year) were obtained, as shown in Figure A-1. At this last level of production, learning seems to be steady without significant improvements beyond this point. The manufacturing costs of the stack reach  $180 \pm 50$  USD/kW, with materials being the main contributors. The *CCM* is the most expensive stack component, representing 78% of the cost. Within the *CCM*, the Nafion® membrane represents 63% of the cost, iridium coating 28%, and platinum coating 8%. The *BOP* shows a contribution of  $260 \pm 70$  USD/kW, representing 63% of the total capital costs. From the elements of the *BOP*, the power supplies represent 43% of the costs, H<sub>2</sub>O circulation 24%, and H<sub>2</sub> processing 23%. The markup installation factor accounted for  $200 \pm 110$  USD/kW, resulting in total uninstalled costs of  $640 \pm 200$  USD/kW. This value agrees with [3], 550 USD/kW for the same relative cumulative production. The installation factor represented an additional  $360 \pm 180$  USD/kW. These costs represent a minimum obtained when cumulative installed capacity increases 500-fold. Assuming an existing installed capacity of 1 GW [8], these costs would be attained when 500 GW of *PEMELs* are installed. Coincidentally, this value would represent a value close to the current H<sub>2</sub> production level if operating at full load (73 Mt H<sub>2</sub>). If we now consider the projected plan of the *EU* to produce 10 Mt H<sub>2</sub> by 2030 ( $\approx 70$  GW at full load) [9], installed costs would reach  $1,250 \pm 350$  USD/kW, while uninstalled costs would represent  $780 \pm 180$  USD/kW. These costs agree with those reported by [10], who reported uninstalled values of 920 USD/kW by 2030.

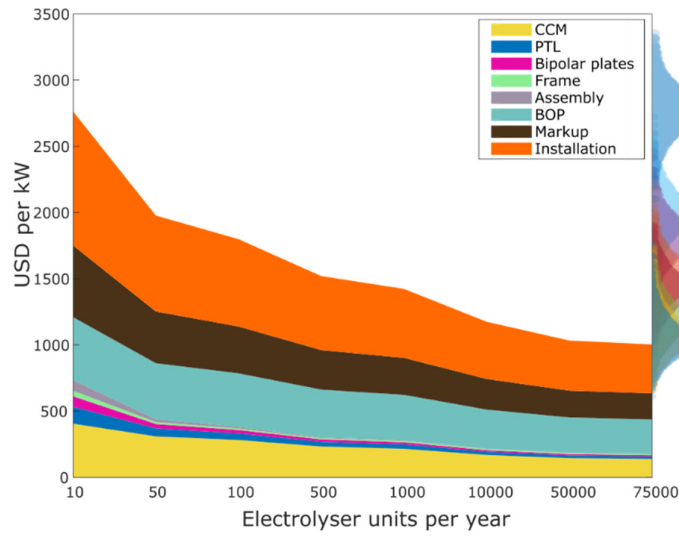

**Figure A-1. Installation costs for 1 MW PEMEL. CCM: Catalyst-coated membrane; PTL: Porous transport layer; BOP: Balance of plant.** Stack is produced in-house, while BOP is outsourced. Individual learning rates ranges are considered for the stack (0-18%), catalyst (0-8%), power supplies (0-12%), gas conditioning (0-7%), and remaining elements of the BOP (0-10%). Markup represents 20-70% of the production cost, and installation factors 33-83% of the total cost of the electrolyser. 3,000 independent samples were considered following a normal distribution.

## A.2. Hydrogen net production cost (NPC)

The NPC of green H<sub>2</sub> is calculated as follows:

### A.2.1. Scenario 1: Excluding the potential savings from the sale of surplus electricity

The NPC of green H<sub>2</sub> is computed using the capital expenditure (CAPEX) and the design capacity of the processes (solar PV, wind, PEMEL) and energy storage (H<sub>2</sub> or electricity) units determined by the  $\gamma$ -AW:E model for each location. The operational expenditure (OPEX) is not included in the NPC calculation as it is deemed negligible—raw materials (H<sub>2</sub>O, sunlight and wind) are abundant, utilities (electricity) are explicitly modelled and fixed OPEX, such as labour costs, are minor compared to the CAPEX. The fixed capital investment (FCI) is then calculated as the sum of all CAPEX. Working capital (WC), which has no depreciation, is estimated to be 10% of total capital investment (TCI) [11]. The TCI, which is the sum of the FCI and WC, is then annualised using the following equation:

$$ACC_{H_2, \text{excluding savings}} = FCI_{H_2} \cdot \left( \frac{ROE \cdot (1+ROE)^t}{(1+ROE)^t - 1} + \frac{ROE}{9} \right) \quad (1)$$

Where ACC denotes the annualised capital cost, ROE, the return on equity and  $t$ , the plant lifetime. The WC is represented in the equation's second term.

Finally, the NPC of green H<sub>2</sub> (expressed in USD/kg) is computed by dividing the ACC by the annual production (AP), as shown below:

$$NPC_{H_2, \text{excluding savings}} = \frac{ACC_{H_2, \text{excluding savings}}}{AP_{H_2}} \quad (2)$$

The model's cost input data can be found in Appendix B.

### A.2.2. Scenario 2: Including the potential savings from the sale of surplus electricity

To assess the potential savings from the sale of surplus electricity over the NPC of green H<sub>2</sub>, we first calculate the NPC of the total electricity being generated from the installed solar PV and wind systems by the procedure described below:

- i) The total electricity produced from the hybrid system is calculated as follows:

$$\text{Electricity produced} = \text{Installed capacity}_{\text{solar}} \times CF_{\text{solar}} + \text{Installed capacity}_{\text{wind}} \times CF_{\text{wind}} \quad (3)$$

- ii) The surplus electricity available for sale is obtained as shown below:

$$\text{Surplus electricity} = \text{Electricity produced} - \text{Electricity used for H}_2 \text{ production} \quad (4)$$

- iii) The FCI of the hybrid electricity system and the NPC of the electricity generated are calculated according to the equations below:

$$FCI_{\text{electricity}} = \text{Installed capacity}_{\text{solar}} \times CAPEX_{\text{solar}} + \text{Installed capacity}_{\text{wind}} \times CAPEX_{\text{wind}} \quad (5)$$

$$NPC_{\text{electricity}} = \frac{ACC_{\text{electricity}}}{AP_{\text{electricity}}} \quad (6)$$

Finally, the *NPC* of green H<sub>2</sub>, including the potential savings from the sale of surplus electricity (expressed in USD/kg), is calculated as follows:

$$\text{Revenue from the sale of surplus electricity} = \text{Surplus electricity} \times NPC_{\text{electricity}} \quad (7)$$

$$NPC_{\text{H}_2, \text{ including savings}} = \frac{(ACC_{\text{H}_2, \text{ excluding savings}} - \text{Revenue from the sale of surplus electricity})}{AP_{\text{H}_2}} \quad (8)$$

### A.3. Cost of intermittency

#### A.3.1. System capacities

The annual availability of wind electricity (kWh<sub>produced</sub>/kW<sub>installed</sub>) is calculated as follows:

$$\text{total wind} = \sum (CF_{\text{in one year}}) \quad (9)$$

The annual wind electricity demand of the baseline system is calculated as shown below:

$$\text{total wind}_{\text{baseline}} = \text{Annual production of green H}_2 \times \text{Electrolyser's electricity demand} \quad (10)$$

The capacity of the (wind) baseline system is obtained as follows:

$$\text{Wind capacity}_{\text{baseline}} = \frac{\text{total wind}_{\text{baseline}}}{\text{total wind}} \quad (11)$$

Where:

$CF_{\text{in one year}}$  is expressed in kWh<sub>produced</sub>/kW<sub>installed</sub>; the annual production of green H<sub>2</sub> in kg<sub>H<sub>2</sub>,g</sub>/yr; the electrolyser's electricity demand in kWh<sub>electricity</sub>/kg<sub>H<sub>2</sub>,g</sub> and, the wind capacity<sub>baseline</sub> in kW.

#### A.3.2. System costs

Once the CAPEX and the design capacity of the processes ( $CAPEX_{\text{solar}}$ ,  $CAPEX_{\text{wind}}$ ,  $CAPEX_{\text{PEMEL}}$  and  $C_{\text{solar}}$ ,  $C_{\text{wind}}$ ,  $C_{\text{PEMEL}}$ , respectively) and energy storage units ( $CAPEX_{\text{H}_2}$ ,  $CAPEX_{\text{electricity}}$  and  $T_{\text{H}_2}$ ,  $T_{\text{electricity}}$ , respectively) are determined by the  $\gamma$ -AW:E model for each location, the optimal fixed capital investment for the baseline system ( $FCI_{\text{baseline}}$ ), i.e., the system where the capacity factor is constant at the annual average, is calculated as follows:

$$CAPEX_{\text{wind}}_{\text{baseline}} = \frac{CAPEX_{\text{wind}} \times \text{Wind capacity}_{\text{baseline}}}{C_{\text{wind}}} \quad (12)$$

$$CAPEX_{\text{PEMEL}}_{\text{baseline}} = \frac{CAPEX_{\text{PEMEL}} \times \text{Hourly production of green H}_2}{C_{\text{PEMEL}}} \quad (13)$$

$$FCI_{\text{baseline}} = CAPEX_{\text{wind}}_{\text{baseline}} + CAPEX_{\text{PEMEL}}_{\text{baseline}} \quad (14)$$

Finally, the fixed capital investment associated with the intermittency is calculated according to the equation below:

$$FCI_{\text{intermittency}} = FCI_{\text{optimal system}} - FCI_{\text{baseline}} \quad (15)$$

The  $FCI_{\text{intermittency}}$  is then annualised and converted to USD/kg<sub>H<sub>2</sub>,g</sub> (from Eq.1 and Eq. 2), which value represents the cost of intermittency of the system.

**Appendix B Input data for  $\gamma$ -AW:E model**

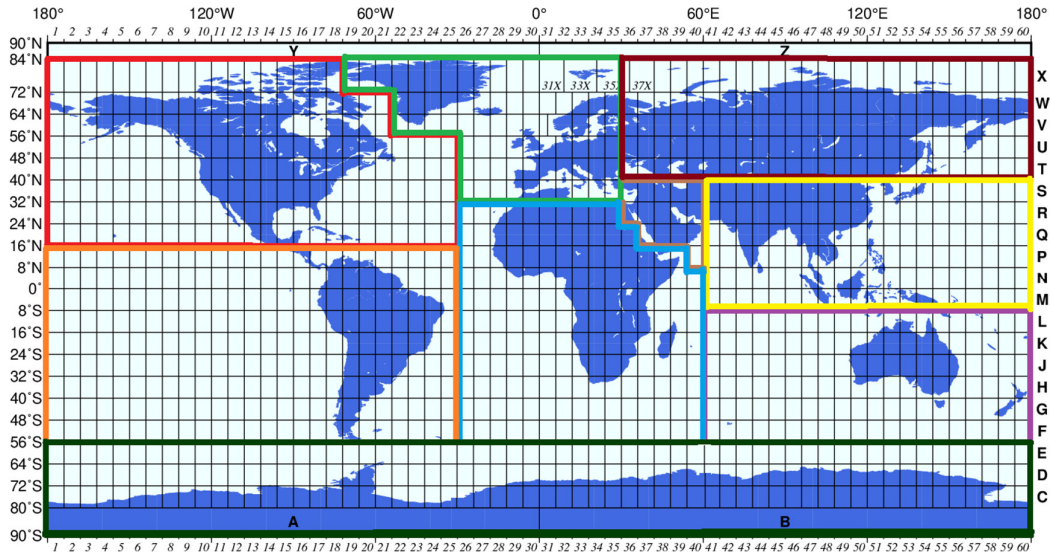

**Figure B-2. Delimitation of zones for the economic analysis.** 1,140 locations are classified in 9 different regions based on the renewables CAPEX reported by the IEA’s World Energy Outlook (WEO) and IRENA [12,13]. The return on equity (ROE) [14], along with the CAPEX of renewable systems for each region, are shown in the table below.

**Table B-1. Economic data per region.**

|      |            |                   |                           | Return on equity, ROE (%) |          |               |         |          |               | CAPEX (USD per kW installed) |              |               |                        |              |               |      |  |
|------|------------|-------------------|---------------------------|---------------------------|----------|---------------|---------|----------|---------------|------------------------------|--------------|---------------|------------------------|--------------|---------------|------|--|
|      |            |                   |                           | 2019                      |          |               | 2050    |          |               | 2019                         |              | 2050          |                        | 2019         |               | 2050 |  |
|      |            |                   |                           | Onshore                   | Offshore | Deep offshore | Onshore | Offshore | Deep offshore | Solar PV – Large scale       | Wind onshore | Wind offshore | Solar PV – Large scale | Wind onshore | Wind offshore |      |  |
| Zone | Colour     | WEO reference     | Zone                      | Onshore                   | Offshore | Deep offshore | Onshore | Offshore | Deep offshore | Solar PV – Large scale       | Wind onshore | Wind offshore | Solar PV – Large scale | Wind onshore | Wind offshore |      |  |
| 1    | Red        | United States     | North America             | 10.7                      | 12.2     | 15.2          | 10.7    | 10.7     | 13.7          | 1220                         | 543          | 1560          | 1413                   | 4260         | 1519          |      |  |
| 2    | Orange     | Brazil            | Central and South America | 16.6                      | 18.1     | 21.1          | 16.6    | 16.6     | 19.6          | 1250                         | 511          | 1560          | 1432                   | 4620         | 1786          |      |  |
| 3    | Green      | European Union    | Europe                    | 9.6                       | 11.1     | 14.1          | 9.6     | 9.6      | 12.6          | 840                          | 400          | 1560          | 1392                   | 3800         | 1561          |      |  |
| 4    | Blue       | Africa            | Africa                    | 22.1                      | 23.6     | 26.6          | 22.1    | 22.1     | 25.1          | 1600                         | 623          | 1950          | 1789                   | 4440         | 1715          |      |  |
| 5    | Dark red   | Russia            | Russia                    | 16.8                      | 18.3     | 21.3          | 16.8    | 16.8     | 19.8          | 2120                         | 813          | 1630          | 1495                   | 4800         | 1865          |      |  |
| 6    | Brown      | Middle East       | Middle East               | 16.9                      | 18.4     | 21.4          | 16.9    | 16.9     | 19.9          | 1000                         | 394          | 1800          | 1626                   | 4580         | 1754          |      |  |
| 7    | Yellow     | India/China/Japan | Asia                      | 12.1                      | 13.6     | 16.6          | 12.1    | 12.1     | 15.1          | 1157                         | 502          | 1513          | 1392                   | 3413         | 1404          |      |  |
| 8    | Purple     | Australia/Oceania | Oceania                   | 9.1                       | 10.6     | 13.6          | 9.1     | 9.1      | 12.1          | 1236                         | 505          | 1555          | 1427                   | 4613         | 1784          |      |  |
| 9    | Dark green | Antarctica        | Antarctica                | 22.1                      | 23.6     | 26.6          | 22.1    | 22.1     | 25.1          | 2120                         | 813          | 1950          | 1789                   | 4800         | 1865          |      |  |



**Table B-2. Cost data of additional equipment units.**

| Equipment                                        | Sizing based on:      | 2019 (today)      | 2050 (future)     | Reference    |
|--------------------------------------------------|-----------------------|-------------------|-------------------|--------------|
|                                                  |                       | USD per size unit | USD per size unit |              |
| <i>PEMEL</i>                                     | 1 kg/h H <sub>2</sub> | 98525*            | 46900*            | Section A.1. |
| Electrical energy storage: Lithium-ion batteries | 1 kWh electricity     | 381               | 149               | [15]         |
| H <sub>2</sub> storage: Type I tanks             | 1 kg H <sub>2</sub>   | 727               | 675               | [16]         |

\* For 2019, the electricity demand to produce 1 kg of H<sub>2</sub> was set at 56.3 kWh, assuming an average electrolyser efficiency of 59% [17]. For 2050, an electrical energy demand of 46.9 kWh/kg<sub>H<sub>2</sub>,g</sub> was assumed, which is equivalent to an average efficiency of the electrolyser of 71% [18].

**Table B-3. Plant data.**

| Parameter                             | Value |
|---------------------------------------|-------|
| Plant lifetime, t (yr) [19–21]        | 20    |
| Target production, t/h H <sub>2</sub> | 30    |

**Appendix C Green H<sub>2</sub> best production locations and cost breakdowns**

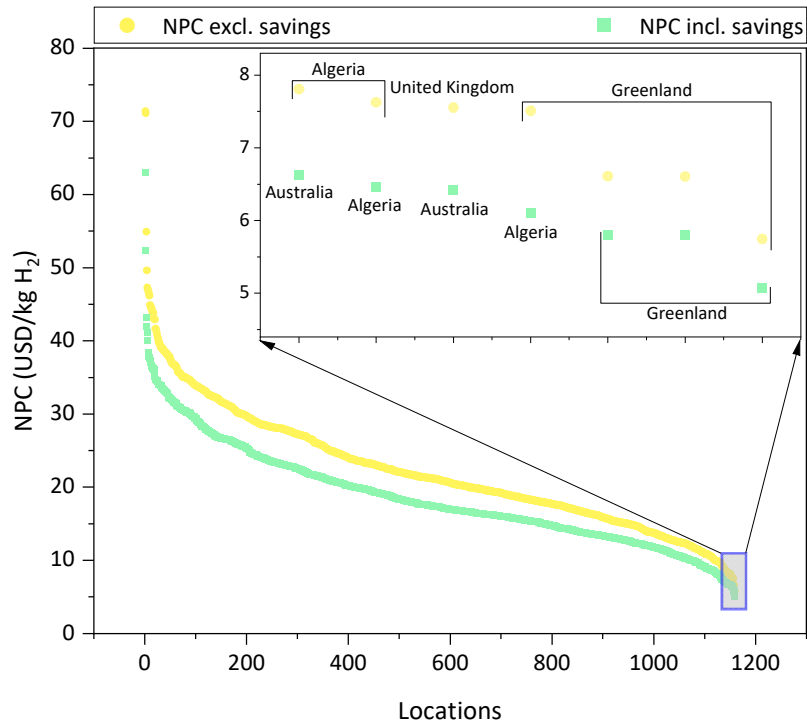

**Figure C-1. Green H<sub>2</sub> best production locations “today”.** The graph presents the cost distribution curves obtained by ordering the *NPCs* from highest to lowest for the scenarios in which the sale of surplus electricity is included (green) and excluded (yellow) in the calculation of the *NPC*. As can be observed, “cheap” H<sub>2</sub> can be produced in very limited locations.

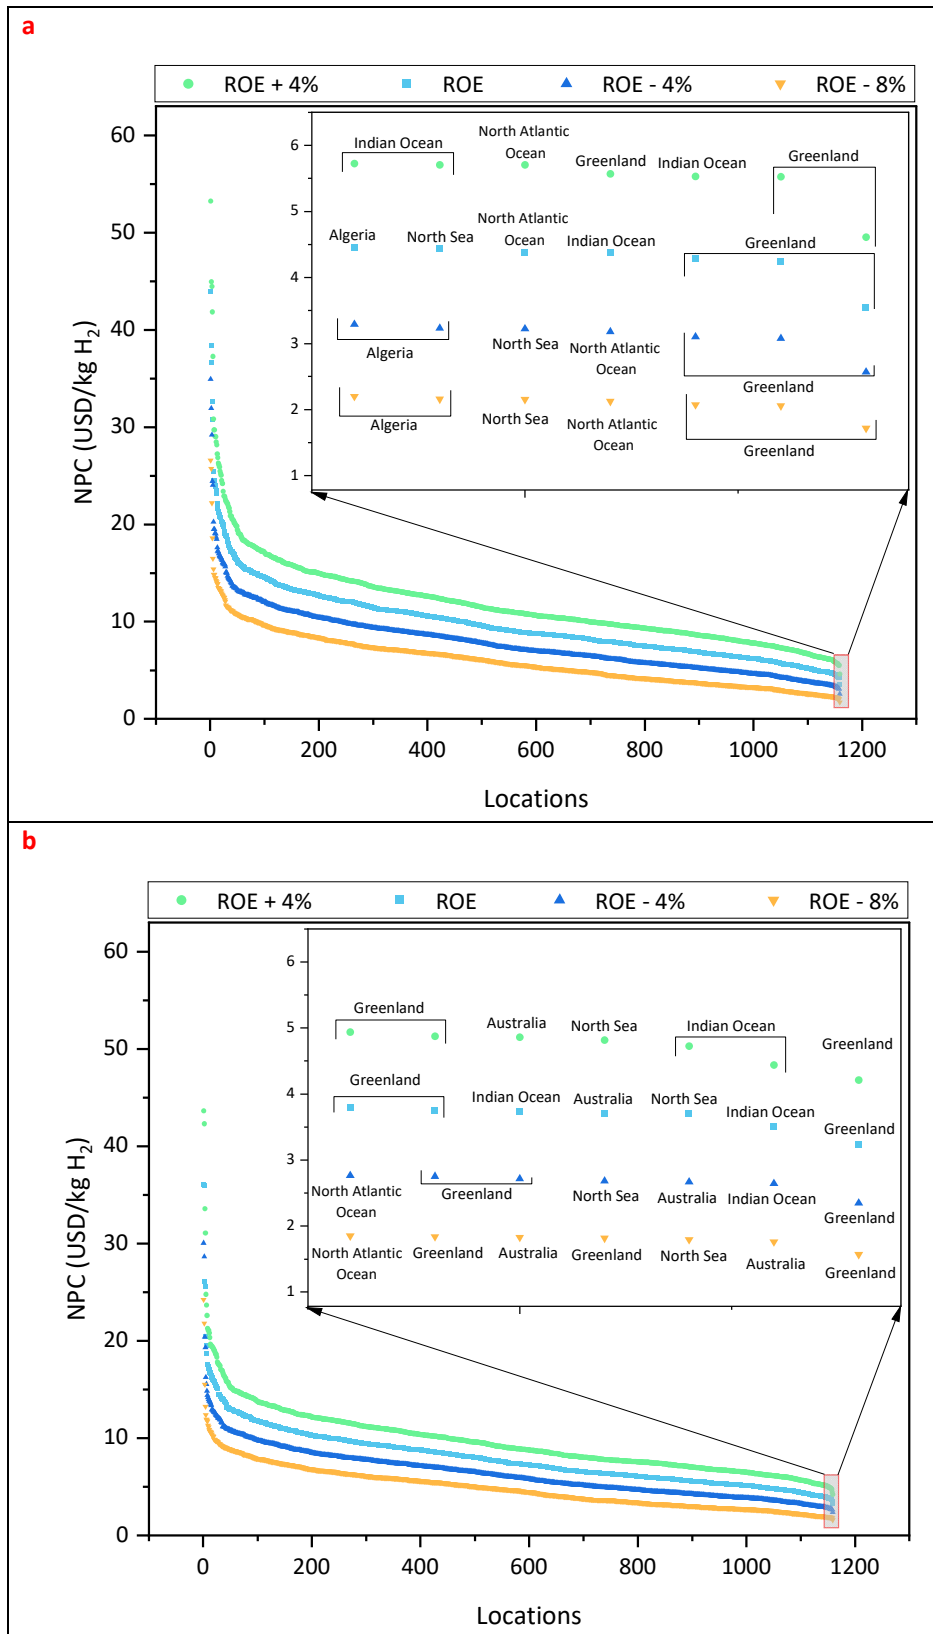

**Figure C-2. Green H<sub>2</sub> best production locations “in the future”.** Subplot *a* and Subplot *b* show the cost distribution curves for the base case scenario (*ROE*) and the scenarios evaluated in the sensitivity analysis, *i.e.*, i) *ROE* - 8%, ii) *ROE* - 4%, and iii) *ROE* + 4%, when revenues from the potential sale of surplus electricity are excluded (*a*) and included (*b*) in the *NPC* of H<sub>2</sub>.

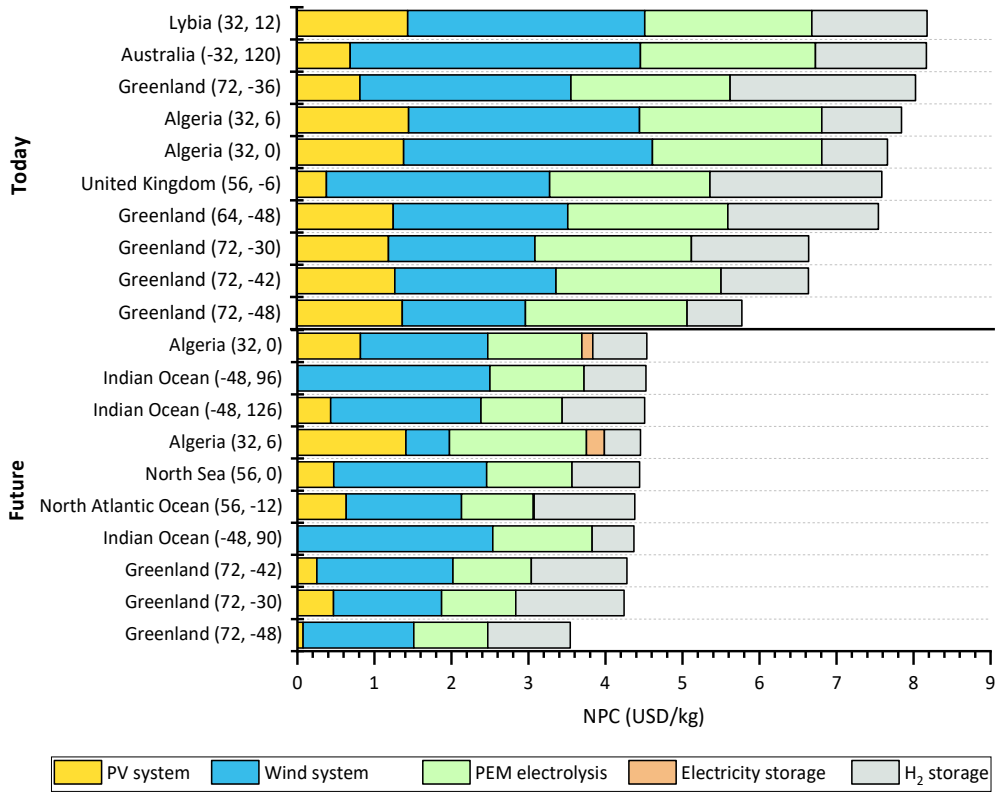

**Figure C-3. Breakdown of the NPC of green H<sub>2</sub>.** This figure depicts the breakdown of the NPC of H<sub>2</sub> for the ten best production locations (latitude, longitude) resulting from the analysis for “today” and the “future”, excluding the revenues from the sale of surplus electricity. In both cases, it is shown that the cost of renewable systems contributes the most to the NPC of green H<sub>2</sub>, followed by the cost of PEM electrolysis and energy storage systems.

## References

- [1] Bareiß K, La Rua C de, Möckl M, Hamacher T. Life cycle assessment of hydrogen from proton exchange membrane water electrolysis in future energy systems. *Applied Energy* 2019;237:862–72.
- [2] Mayyas AT, Ruth MF, Pivovar BS, Bender G, Wipke KB. *Manufacturing Cost Analysis for Proton Exchange Membrane Water Electrolyzers*; 2019.
- [3] Böhm H, Goers S, Zauner A. Estimating future costs of power-to-gas – a component-based approach for technological learning. *International Journal of Hydrogen Energy* 2019;44(59):30789–805.
- [4] Böhm H, Zauner A, Rosenfeld DC, Tichler R. Projecting cost development for future large-scale power-to-gas implementations by scaling effects. *Applied Energy* 2020;264:114780.
- [5] James BD, DeSantis DA. *Manufacturing cost and installed price analysis of stationary fuel cell systems*. Strategic Analysis Inc 2015.
- [6] Metalary. Latest and Historical Metal Prices. [July 14, 2020]; Available from: <http://www.metalary.com/>.
- [7] Fuel Cell Store. [July 14, 2020]; Available from: <https://www.fuelcellstore.com/>.
- [8] Schmidt O, Gambhir A, Staffell I, Hawkes A, Nelson J, Few S. Future cost and performance of water electrolysis: An expert elicitation study. *International Journal of Hydrogen Energy* 2017;42(52):30470–92.
- [9] Bezzato S, Saini A, Liu R. *Hydrogen: Study on European Hydrogen Backbone*. United Kingdom; 2020.
- [10] Buttler A, Spliethoff H. Current status of water electrolysis for energy storage, grid balancing and sector coupling via power-to-gas and power-to-liquids: A review. *Renewable and Sustainable Energy Reviews* 2018;82:2440–54.
- [11] Albrecht FG, König DH, Baucks N, Dietrich R-U. A standardized methodology for the techno-economic evaluation of alternative fuels – A case study. *Fuel* 2017;194:511–26.
- [12] IEA. *World Energy Outlook 2019*. Paris: OECD Publishing; 2019.
- [13] International Renewable Energy Agency (IRENA). *Renewable power generation costs in 2019 2020*.
- [14] Fernandez P, Martinez M, Fernández Acín I. Market Risk Premium and Risk-Free Rate Used for 69 Countries in 2019: A Survey. *SSRN Journal* 2019.
- [15] Schmidt O, Melchior S, Hawkes A, Staffell I. Projecting the Future Levelized Cost of Electricity Storage Technologies. *Joule* 2019;3(1):81–100.
- [16] Tietze V, Luhr S, Stolten D. Bulk Storage Vessels for Compressed and Liquid Hydrogen. In: Stolten PD, Emonts DB, editors. *Hydrogen Science and Engineering Materials, Processes, Systems and Technology*. Weinheim, Germany: Wiley-VCH Verlag GmbH & Co. KGaA; 2016, p. 659–690.
- [17] Jovan DJ, Dolanc G. Can Green Hydrogen Production Be Economically Viable under Current Market Conditions. *Energies* 2020;13(24):6599.
- [18] IEA. *The Future of Hydrogen*. [January 31, 2022]; Available from: <https://www.iea.org/reports/the-future-of-hydrogen>.
- [19] Michailos S, McCord S, Sick V, Stokes G, Styring P. Dimethyl ether synthesis via captured CO<sub>2</sub> hydrogenation within the power to liquids concept: A techno-economic assessment. *Energy Conversion and Management* 2019;184:262–76.

- [20] Mathiesen BV, Ridjan I, Connolly D, Nielsen MP, Hendriksen PV, Mogensen MB et al. Technology data for high temperature solid oxide electrolyser cells, alkali and PEM electrolyzers: Technology data for high temperature solid oxide electrolyser cells, alkali and PEM electrolyzers; 2013.
- [21] Carmo M, Fritz DL, Mergel J, Stolten D. A comprehensive review on PEM water electrolysis. International Journal of Hydrogen Energy 2013;38(12):4901–34.
